# Supplementary material
Source: Elsevier journal article supplement (https://www.sciencedirect.com/science/article/pii/S1413867018305543)
Supplement: mmc1 [file S1413867018305543:mmc1.doc]

**Supplementary Table 1. Amino acid sequence of synthetic overlapping peptides of Rv1983p257-558, Rv1986, Rv1987, Rv1988, Rv1989c, ESAT-6, and CFP-10.**

| **Peptide** | **Position** | **Amino acid sequencea** | **Length(AA)** |
| --- | --- | --- | --- |
| Rv1983 |  |  |  |
| Rv1983-P1 | P257-276 | GYGVSGPGGDGRTVPLEIIH | 20 |
| Rv1983-P2 | P268-287 | RTVPLEIIHVTEPTVHANVN | 20 |
| Rv1983-P3 | P279-298 | EPTVHANVNGGPTSTILVDT | 20 |
| Rv1983-P4 | P290-309 | PTSTILVDTGSAGLVVSPED | 20 |
| Rv1983-P5 | P301-320 | AGLVVSPEDVGGILGVLHMG | 20 |
| Rv1983-P6 | P312-331 | GILGVLHMGLPTGLSISGYS | 20 |
| Rv1983-P7 | P323-342 | TGLSISGYSGGLYYIFATYT | 20 |
| Rv1983-P8 | P334-353 | LYYIFATYTTTVDFGNGIVT | 20 |
| Rv1983-P9 | P345-364 | VDFGNGIVTAPTAVNVVLLS | 20 |
| Rv1983-P10 | P356-375 | TAVNVVLLSIPTSPFAISTY | 20 |
| Rv1983-P11 | P367-386 | TSPFAISTYFSALLADPTTT | 20 |
| Rv1983-P12 | P378-397 | ALLADPTTTPFEAYFGAVGV | 20 |
| Rv1983-P13 | P389-408 | EAYFGAVGVDGVLGVGPNAV | 20 |
| Rv1983-P14 | P400-419 | VLGVGPNAVGPGPSIPTMAL | 20 |
| Rv1983-P15 | P411-430 | GPSIPTMALPGDLNQGVLID | 20 |
| Rv1983-P16 | P422-441 | DLNQGVLIDAPAGELVFGPN | 20 |
| Rv1983-P17 | P433-452 | AGELVFGPNPLPAPNVEVVG | 20 |
| Rv1983-P18 | P444-463 | PAPNVEVVGSPITTLYVKID | 20 |
| Rv1983-P19 | P455-474 | ITTLYVKIDGGTPIPVPSII | 20 |
| Rv1983-P20 | P466-485 | TPIPVPSIIDSGGVTGTIPS | 20 |
| Rv1983-P21 | P477-496 | GGVTGTIPSYVIGSGTLPAN | 20 |
| Rv1983-P22 | P488-507 | IGSGTLPANTNIEVYTSPGG | 20 |
| Rv1983-P23 | P499-518 | IEVYTSPGGDRLYAFNTNDY | 20 |
| Rv1983-P24 | P510-529 | LYAFNTNDYRPTVISSGLMN | 20 |
| Rv1983-P25 | P521-540 | TVISSGLMNTGFLPFRFQPV | 20 |
| Rv1983-P26 | P532-551 | FLPFRFQPVYIDYSPSGIGT | 20 |
| Rv1983-P27 | P543-558 | DYSPSGIGTTVFDHPA | 16 |
| Rv1986 |  |  |  |
| Rv1986-P1 | P1-20 | VNSPLVVGFLACFTLIAAIG | 20 |
| Rv1986-P2 | P12-31 | CFTLIAAIGAQNAFVLRQGI | 20 |
| Rv1986-P3 | P23-42 | NAFVLRQGIQREHVLPVVAL | 20 |
| Rv1986-P4 | P35-54 | HVLPVVALCTVSDIVLIAAG | 20 |
| Rv1986-P5 | P46-65 | SDIVLIAAGIAGFGALIGAH | 20 |
| Rv1986-P6 | P57-76 | GFGALIGAHPRALNVVKFGG | 20 |
| Rv1986-P7 | P68-87 | ALNVVKFGGAAFLIGYGLLA | 20 |
| Rv1986-P8 | P80-99 | LIGYGLLAARRAWRPVALIP | 20 |
| Rv1986-P9 | P91-110 | AWRPVALIPSGATPVRLAEV | 20 |
| Rv1986-P10 | P102-120 | ATPVRLAEVLVTCAAFTFL | 19 |
| Rv1986-P11 | P113-132 | TCAAFTFLNPHVYLDTVVLL | 20 |
| Rv1986-P12 | P124-143 | VYLDTVVLLGALANEHSDQR | 20 |
| Rv1986-P13 | P135-154 | LANEHSDQRWLFGLGAVTAS | 20 |
| Rv1986-P14 | P146-165 | FGLGAVTASAVWFATLGFGA | 20 |
| Rv1986-P15 | P157-176 | WFATLGFGAGRLRGLFTNPG | 20 |
| Rv1986-P16 | P168-187 | LRGLFTNPGSWRILDGLIAV | 20 |
| Rv1986-P17 | P179-199 | RILDGLIAVMMVALGISLTVT | 21 |
| Rv1987 |  |  |  |
| Rv1987-P1 | P1-20 | MAGLNIYVRRWRTALHATVS | 20 |
| Rv1987-P2 | P12-31 | RTALHATVSALIVAILGLAI | 20 |
| Rv1987-P3 | P23-42 | IVAILGLAITPVASAATARA | 20 |
| Rv1987-P4 | P34-53 | VASAATARATLSVTSTWQTG | 20 |
| Rv1987-P5 | P45-64 | SVTSTWQTGFIARFTITNSS | 20 |
| Rv1987-P6 | P56-75 | ARFTITNSSTAPLTDWKLEF | 20 |
| Rv1987-P7 | P67-86 | PLTDWKLEFDLPAGESVLHT | 20 |
| Rv1987-P8 | P78-97 | PAGESVLHTWNSTVARSGTH | 20 |
| Rv1987-P9 | P89-108 | STVARSGTHYVLSPANWNRI | 20 |
| Rv1987-P10 | P100-119 | LSPANWNRIIAPGGSATGGL | 20 |
| Rv1987-P11 | P111-130 | PGGSATGGLRGGLTGSYSPP | 20 |
| Rv1987-P12 | P122-142 | GLTGSYSPPSSCLLNGQYPCT | 21 |
| Rv1988 |  |  |  |
| Rv1988-P1 | P1-20 | VSALGRSRRAWGWHRLHDEW | 20 |
| Rv1988-P2 | P12-31 | GWHRLHDEWAARVVSAAAVR | 20 |
| Rv1988-P3 | P23-42 | RVVSAAAVRPGELVFDIGAG | 20 |
| Rv1988-P4 | P34-53 | ELVFDIGAGEGALTAHLVRA | 20 |
| Rv1988-P5 | P45-64 | ALTAHLVRAGARVVAVELHP | 20 |
| Rv1988-P6 | P56-75 | RVVAVELHPRRVGVLRERFP | 20 |
| Rv1988-P7 | P67-86 | VGVLRERFPGITVVHADAAS | 20 |
| Rv1988-P8 | P78-97 | TVVHADAASIRLPGRPFRVV | 20 |
| Rv1988-P9 | P89-108 | LPGRPFRVVANPPYGISSRL | 20 |
| Rv1988-P10 | P100-119 | PPYGISSRLLRTLLAPNSGL | 20 |
| Rv1988-P11 | P111-130 | TLLAPNSGLVAADLVLQRAL | 20 |
| Rv1988-P12 | P122-141 | ADLVLQRALVCKFASRNARR | 20 |
| Rv1988-P13 | P133-152 | KFASRNARRFTLTVGLMLPR | 20 |
| Rv1988-P14 | P144-163 | LTVGLMLPRRAFLPPPHVDS | 20 |
| Rv1988-P15 | P155-179 | FLPPPHVDSAVLVVRRRKCGDWQGR | 25 |
| Rv1989c |  |  |  |
| Rv1989c-P1 | P1-20 | VSDALDEGLVQRIDARGTIE | 20 |
| Rv1989c-P2 | P12-31 | RIDARGTIEWSETCYRYTGA | 20 |
| Rv1989c-P3 | P23-42 | ETCYRYTGAHRDALSGEGAR | 20 |
| Rv1989c-P4 | P34-53 | DALSGEGARRFGGRWNPPLL | 20 |
| Rv1989c-P5 | P45-64 | GGRWNPPLLFPAIYLADSAQ | 20 |
| Rv1989c-P6 | P56-75 | AIYLADSAQACMVEVERAAQ | 20 |
| Rv1989c-P7 | P67-86 | MVEVERAAQAASTTAEKMLE | 20 |
| Rv1989c-P8 | P78-97 | STTAEKMLEAAYRLHTIDVT | 20 |
| Rv1989c-P9 | P89-108 | YRLHTIDVTDLAVLDLTTPQ | 20 |
| Rv1989c-P10 | P100-119 | AVLDLTTPQAREAVGLENDD | 20 |
| Rv1989c-P11 | P111-130 | EAVGLENDDIYGDDWSGCQA | 20 |
| Rv1989c-P12 | P122-141 | GDDWSGCQAVGHAAWFLHMQ | 20 |
| Rv1989c-P13 | P133-152 | HAAWFLHMQGVLVPAAGGVG | 20 |
| Rv1989c-P14 | P144-163 | LVPAAGGVGLVVTAYEQRTR | 20 |
| Rv1989c-P15 | P155-174 | VTAYEQRTRPGQLQLRQSVD | 20 |
| Rv1989c-P16 | P166-186 | QLQLRQSVDLTPALYQELRAT | 21 |
| ESAT6-P1 | P1-20 | MTEQQWNFAGIEAAASAIQG | 20 |
| ESAT6-P2 | P12-31 | EAAASAIQGNVTSIHSLLDE | 20 |
| ESAT6-P3 | P23-42 | TSIHSLLDEGKQSLTKLAAA | 20 |
| ESAT6-P4 | P34-53 | QSLTKLAAAWGGSGSEAYQG | 20 |
| ESAT6-P5 | P45-64 | GSGSEAYQGVQQKWDATATE | 20 |
| ESAT6-P6 | P56-75 | QKWDATATELNNALQNLART | 20 |
| ESAT6-P7 | P67-86 | NALQNLARTISEAGQAMAST | 20 |
| ESAT6-P8 | P78-95 | EAGQAMASTEGNVTGMFA | 18 |
| CFP10-P1 | P1-20 | MAEMKTDAATLAQEAGNFER | 20 |
| CFP10-P2 | P12-31 | AQEAGNFERISGDLKTQIDQ | 20 |
| CFP10-P3 | P23-42 | GDLKTQIDQVESTAGSLQGQ | 20 |
| CFP10-P4 | P34-53 | STAGSLQGQWRGAAGTAAQA | 20 |
| CFP10-P5 | P45-64 | GAAGTAAQAAVVRFQEAANK | 20 |
| CFP10-P6 | P56-75 | VRFQEAANKQKQELDEISTN | 20 |
| CFP10-P7 | P67-86 | QELDEISTNIRQAGVQYSRA | 20 |
| CFP10-P8 | P78-100 | QAGVQYSRADEEQQQALSSQMGF | 23 |

a Amino acid sequences are shown in single letter code from the N terminus to the C terminus.
